# Supplementary material for: DRP-1 functions independently of mitochondrial structural perturbations to facilitate BH3 mimetic-mediated apoptosis
Source: PubMed Central journal article supplement (PMC6637195; doi:10.1038/s41420-019-0199-x), 2019-07-17

# Figure S2

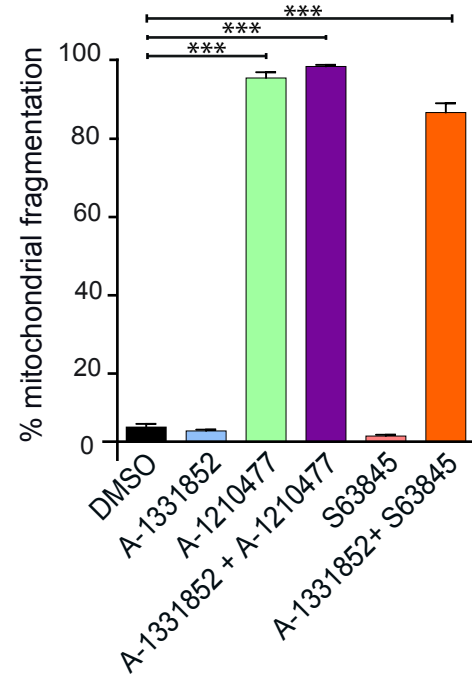

Supplement: 41420_2019_199_MOESM4_ESM.pdf [file 41420_2019_199_MOESM4_ESM.pdf]
